# Supplementary material for: A low-cost fluorescence reader for in vitro transcription and nucleic acid detection with Cas13a
Source: PubMed Central journal article supplement (PMC6919979; doi:10.1371/journal.pone.0220091), 2019-12-18
Supplement: pone.0220091.s009.pdf [file pone.0220091.s009.pdf]

p2CT-His-MBU-Lbu\_C13a\_WT

<https://benchling.com/s/seq-iiOl2ZpMc8ZHUZwu1GRj>

T7 promoter, 6x His, TEV cleavage site, Lbu Cas13a, T7 terminator

TAATACGACTCACTATA GGGAGACCACAACGGTTTCCCTCTAGTGCCGGCT  
CCGGAGAGCTCTTTAATTAAGCGGCCGCCCTGCAGGACTCGAGTTCTAGA  
ATAATTTTGTTTAACTTTAAGAAGGAGATATACATATGAAATCTTCTCACCA  
TCACCATCACCATGGTTCTTCTATGAAAATCGAAGAAGGTAACTGGTAATC  
TGGATTAACGGCGATAAAGGCTATAACGGTCTCGCTGAAGTCGGTAAGAAA  
TTCGAGAAAAGATACCGGAATTAAGTCACCGTTGAGCATCCGGATAAACTG  
GAAGAGAAATTCCCACAGGTTGCGGCAACTGGCGATGGCCCTGACATTAT  
CTTCTGGGCACACGACCGCTTTGGTGGCTACGCTCAATCTGGCCTGTTGG  
CTGAAATCACCCCGGACAAAGCGTTCCAGGACAAGCTGTATCCGTTTACCT  
GGGATGCCGTACGTTACAACGGCAAGCTGATTGCTTACCCGATCGCTGTT  
GAAGCGTTATCGCTGATTTATAACAAAGATCTGCTGCCGAACCCGCCAAAA  
ACCTGGGAAGAGATCCCGGCGCTGGATAAAGAAGCTGAAAGCGAAAGGTAA  
GAGCGCGCTGATGTTCAACCTGCAAGAACCGTACTTCACCTGGCCGCTGA  
TTGCTGCTGACGGGGTATGCGTTCAAGTATGAAAACGGCAAGTACGAC  
ATTAAGACGTGGGCGTGGATAACGCTGGCGCGAAAGCGGGTCTGACCTT  
CCTGGTTGACCTGATTAACAAACACATGAATGCAGACACCGATTACTC  
CATCGCAGAAGCTGCCTTTAATAAAGGCGAAACAGCGATGACCATCAACG  
GCCCGTGGGCATGGTCCAACATCGACACCAGCAAAGTGAATTATGGTGTA  
ACGGTACTGCCGACCTTCAAGGGTCAACCATCAAACCGTTCGTTGGCGT  
GCTGAGCGCAGGTATTAACGCCGCCAGTCCGAACAAAGAGCTGGCAAAA  
GAGTTCCTCGAAAATCTGCTGACTGATGAAGGTCTGGAAGCGGTTAAT  
AAAGACAAACCGCTGGGTGCCGTAGCGCTGAAGTCTTACGAGGAAGAGTT  
GGCGAAAGATCCACGTATTGCCGCCACTATGGAAAACGCCAGAAAGGTG  
AAATCATGCCGAACATCCCGCAGATGTCCGCTTTCTGGTATGCCGTGCGTA  
CTGCGGTGATCAACGCCGCCAGCGGTCGTCAGACTGTGATGAAGCCCT  
GAAAGACGCGCAGACTAATTCGAGCTCGAACAACAACAACAATAACAATAA  
CAACAACCTCGGGATCGAGGAAAACCTGTACTTCCAATCCAAATgcaATGAA  
AGTGACGAAGGTAGGAGGCATTTGCATAAGAAGTACACGTCCGAAGGCC  
GCTTAGTGAAGTCAGAATCGGAAGAAAATCGCACAGACGAACGTCTGTGCG  
GCGTTGCTTAATATGCGCCTTGACATGTATATCAAGAATCCCAGCAGCAG  
GAAACCAAGGAAAATCAAAAACGCATTGGGAAATTAAGAAATTTCTTCAA  
ACAAAATGGTCTATCTTAAGACAATACCTTGAGTTTGAAGAATGGGAAAAA  
GGAGAACATTGATCGTGAGTATTCTGAGACTGACATCCTTGAGAGCGATGT  
CCGTGACAAGAAAACTTCGCCGTGTTGAAAAAGATCTATCTGAATGAAAA  
CGTGAACCTCGGAGGAATTGGAAGTTTTTCGTAACGACATTAAGAAGAACT  
GAACAAAATCAACAGCCTGAAGTACTCATTTGAAAAGAATAAGGCGAATTAT  
CAAAGATTAATGAGAATAACATCGAGAAGGTTGAAGGTAAGTCAAAGCGT  
AACATTATTTACGATTATTATCGTGAGTCAGCGAAACGTGACGCTTATGTAA  
GCAATGTGAAAGAAGCCTTTGATAAGCTTTACAAGGAAGAGGACATTGCAA  
AACTTGTTCTTGAAATTGAGAACCCTTACGAAGTTAGAGAAATACAAGATTCG  
CGAGTTCTACCACGAAATTATTGGACGTAAGAATGACAAGGAAAACCTTGC

AAAAATCATCTACGAAGAAATCCAGAATGTTAATAACATGAAAGAGTTGATC  
GAGAAGGTACCGGACATGAGTGAGTTGAAAAAGAGCCAAGTATTTTACAAG  
TATTACTTAGACAAAGAAGAGTTGAACGACAAGAACATCAAATACGCGTTTT  
GTCATTTTCGTGGAAATCGAAATGAGTCAGTTGCTGAAGAACTACGTATATAA  
GCGCTTAAGTAATATCTCGAATGACAAAATTAAGCGTATCTTTGAATACCAG  
AACTTGAAAAAATTGATCGAAAATAAGCTGTTAAACAACTTGACACGTACG  
TCCGTAATTGTGGAAAGTATAATTATTATTTGCAAGACGGCGAAATTGCCAC  
TTCAGATTTTCATCGCCCGCAACCGTCAGAATGAAGCGTTTTCTTCGCAACAT  
CATTGGGGTGTGCATCTGTGGCCTACTTTTCTCTTCGCAACATTCTTGAAACG  
GAGAACGAGAATGATTAATCTGGGCGTATGCGCGGCAAACAGTTAAGAA  
CAATAAAGGTGAAGAGAAGTACGTGTCCGGAGAAGTTGATAAGATCTATAA  
TGAAAATAAGAAGAACGAGGTTAAGGAGAACTTAAAAATGTTCTATTCGTAC  
GATTTCAATATGGACAACAAGAATGAAATCGAAGATTTCTTCGCCAACATCG  
ACGAGGCGATTTCTTCCATCCGTCACGGTATTGTCCACTTCAACTTGGAAT  
TAGAAGGTAAGGATATCTTTGCGTTCAAGAACATTGCGCCATCCGAAATCT  
CAAAGAAGATGTTTCAGAATGAGATTAACGAGAAAAAACTGAAATTGAAGAT  
CTTTCGTCAACTGAACTCTGCCAACGTGTTCCGCTATCTCGAAAAGTATAAA  
ATTCTGAATTACCTTAAACGTACACGCTTCGAGTTTGTCAATAAAAATATCC  
CATTTCGTCCCGTCTTTCACCAAATTATATTGCGCGATTGATGACCTGAAGAA  
TAGTCTTGGGATTTACTGGAAAACCTCCGAAAACAAACGACGACAATAAGAC  
TAAGGAGATTATTGATGCCCAAATCTATTTGCTTAAAAACATCTATTACGGG  
GAGTTCCTGAATTATTTTCATGTCGAACAATGGTAATTTCTTTGAGATTTCTAA  
AGAAATCATCGAATTGAACAAGAACGATAAACGCAACTTAAAGACTGGGTT  
TTACAAGCTGCAAAGTTTGAAGACATCCAGGAGAAGATTCCAAGGAATA  
CTTGGCGAATATCCAGTCCCTGTACATGATTAATGCCGGTAATCAGGACGA  
AGAAGAAAAGGACACTTATATTGATTTCAATCAAAGATCTTCTTAAAGGGA  
TTTATGACGTATCTTGCTAATAACGGTCGTTTAAAGTCTGATTTACATCGGCT  
CGGATGAAGAAACAAATACGTCATTAGCAGAAAAGAAGCAAGAGTTTGACA  
AGTTCCTGAAGAAGTACGAGCAGAACAATAATATCAAGATCCCCTATGAGA  
TCAATGAATTCCTGCGTGAGATCAAACCTGGGAAACATCCTGAAGTATACTG  
AGCGTTTAAACATGTTCTACCTTATCTTAAAGCTTTTGAATCACAAGGAGCT  
GACAAATCTGAAGGGTAGTCTTGAAAAATATCAGTCTGCCAATAAGGAAGA  
AGCGTTCCTGACCAATTGGAGTTAATTAACCTGCTTAACCTTGACAACAAC  
CGCGTGACGGAAGACTTCGAATTAGAGGCCGACGAGATTGGAAAATTTCTT  
GATTTCAATGGCAACAAGTTAAGGATAACAAGGAACTGAAAAAGTTTCGATA  
CAAACAAGATCTACTTTGACGGCGAGAACATTATCAAACACCGTGCCCTTCT  
ACAATATTAAGAAATATGGCATGTTAACTTACTGGAGAAAATTGCCGACAA  
GGCTGGATAACAAGATCTCGATCGAAGAGCTGAAGAAATACTCCAATAAAAA  
GAATGAGATCGAGAAGAACCATAAGATGCAGGAAAATCTGCACCGCAAATA  
CGCTCGTCCCCGTAAAGACGAGAAGTTTACAGATGAGGACTATGAAAGTTA  
CAAGCAAGCTATTGAGAATATTGAGGAGTACACCCACCTTAAGAACAAGGT  
AGAATTCATGAGCTGAATTTACTGCAGGGCCTGTTGCTGCGCATTTTACAT  
CGTTTAGTCCGATATACCTCAATTTGGGAACGCGATCTGCGCTTCCGCTT  
AAAGGTGAGTTCCAGAAAACCAATACATCGAAGAGATCTTCAACTTTGAA  
ATAAGAAGAACGTGAAGTACAAAGGGGGTTCAGATTGTAGAGAAATACATT  
AAATTCTACAAGGAATTACATCAAATGATGAAGTTAAGATCAACAAGTACA  
GTTCCGCGAATATCAAGGTGTTGAAGCAAGAAAAGAAGGACCTTTATATTC  
GaATTACATCGCCCACTTCAATTATATTCTCACGCCGAGATCTCACTGCT

GGAAGTCCTTGAAAATTTGCGTAAATTGCTGTCCTACGATCGCAAACCTGAA  
AAATGCCGTAATGAAATCAGTAGTTGATATCCTTAAGGAGTATGGTTTTGTA  
GCCACATTCAAATCGGGGCGGACAAGAAGATCGGTATTCAGACACTGGA  
GAGCGAAAAAATCGTGCATCTTAAGAATCTTAAGAAGAAGAAGTTAATGACT  
GACCGCAATTCGAGGAACTTTGCAAATTGGTGAAGATTATGTTTGAATACA  
AAATGGAAGAGAAAAAGTCTGAAAACtaataacATTGGAAGTGGATAACGGAT  
CCGCGATCGCGGCGCGCCACCTGGTGGCCGGCCGGTACCACGCGTGCG  
CGCTGATCCGGCTGCTAACAAAGCCCGAAAGGAAGCTGAGTTGGCTGCTG  
CCACCGCTGAGCAATAACTAGCATAACCCCTTGGGGCCTCTAAACGGGTC  
TTGAGGGGTTTTTTTGTGAAAGGAGGAACTATATCCGGATATCCACAGGAC  
GGGTGTGGTTCGCCATGATCGCGTAGTCGATAGTGGCTCCAAGTAGCGAAG  
CGAGCAGGACTGGGCGGCGGCCAAAGCGGTCCGACAGTGCTCCGAGAA  
CGGGTGCGCATAGAAATTGCATCAACGCATATAGCGCTAGCAGCACGCCA  
TAGTGACTGGCGATGCTGTCGGAATGGACGATATCCCGCAAGAGGCCCG  
GCAGTACCGGCATAACCAAGCCTATGCCTACAGCATCCAGGGTGACGGTG  
CCGAGGATGACGATGAGCGCATTGTTAGATTTTCATACACGGTGCCTGACT  
GCGTTAGCAATTTAACTGTGATAAACTACCGCATTAAAGCTTATCGATGATA  
AGCTGTCAAACATGAGAATCTTGAAGACGAAAGGGCCTCGTGATACGCCCT  
ATTTTTATAGGTTAATGTCATGATAATAATGGTTTTCTTAGACGTCAGGTGGCA  
CTTTTCGGGAAATGTGCGCGGAACCCCTATTTGTTTATTTTTCTAAATACA  
TTCAAATATGTATCCGCTCATGAGACAATAACCCTGATAAATGCTTCAATAA  
CATTGAAAAAGGAAGAGTATGAGTATTCAACATTTCCGTGTGCCCTTATTC  
CCTTTTTTGCGGCATTTTGCCTTCCGTGTTTTTGCTCACCCAGAAACGCTGGT  
GAAAGTAAAAGATGCTGAAGATCAGTTGGGTGCACGAGTGGGTTACATCG  
AACTGGATCTCAACAGCGGTAAGATCCTTGAGAGTTTTCGCCCCGAAGAAC  
GTTTTCCAATGATGAGCACTTTTAAAGTTCTGCTATGTGGCGCGGTATTATC  
CCGTGTTGACGCCGGGCAAGAGCAACTCGGTCCGCGCATACACTATTCTC  
AGAATGACTTGGTTGAGTACTCACAGAAAAGCATCTTACGGATG  
GCATGACAGTAAGAGAATTATGCAGTGCTGCCATAACCATGAGTGATAACA  
CTGCGGCCAACTTACTTCTGACAACGATCGGAGGACCGAAGGAGCTAACC  
GCTTTTTTGCACAACATGGGGGATCATGTAACCTCGCCTTGATCGTTGGGAA  
CCGGAGCTGAATGAAGCCATACCAAACGACGAGCGTGACACCACGATGC  
CTGCAGCAATGGCAACAACGTTGCGCAAACCTATTAACCTGGCGAACTACTTA  
CTCTAGCTTCCCGGCAACAATTAAGACTGGATGGAGGCGGATAAAGTTG  
CAGGACCACTTCTGCGCTCGGCCCTTCCGGCTGGCTGGTTTATTGCTGAT  
AAATCTGGAGCCGGTGAGCGTGGGTCTCGCGGTATCATTGCAGCACTGGG  
GCCAGATGGTAAGCCCTCCCGTATCGTAGTTATCTACACGACGGGGAGTC  
AGGCAACTATGGATGAACGAAATAGACAGATCGCTGAGATAGGTGCCTCA  
CTGATTAAGCATTGGTAACTGTCAGACCAAGTTTACTCATATATACTTTAGAT  
TGATTTAAAACCTTCATTTTTAATTTAAAAGGATCTAGGTGAAGATCCTTTTTGA  
TAATCTCATGACCAAATCCCTTAACGTGAGTTTTCGTTCCACTGAGCGTCA  
GACCCCGTAGAAAAGATCAAAGGATCTTCTTGAGATCCTTTTTTTCTGCGC  
GTAATCTGCTGCTTGCAAACAAAAAACCACCGCTACCAGCGGTGGTTTTGT  
TTGCCGGATCAAGAGCTACCAACTCTTTTTCCGAAGGTAACCTGGCTTCAGC  
AGAGCGCAGATACCAAATACTGTCTTCTAGTGTAGCCGTAGTTAGGCCAC  
CACTTCAAGAACTCTGTAGCACCGCCTACATACCTCGCTCTGCTAATCCTG  
TTACCAGTGGCTGCTGCCAGTGGCGATAAGTCGTGTCTTACCGGGTTGGA  
CTCAAGACGATAGTTACCGGATAAGGCGCAGCGGTCCGGCTGAACGGGG

GGTTCGTGCACACAGCCCAGCTTGGAGCGAACGACCTACACCGAACTGA  
GATACCTACAGCGTGAGCTATGAGAAAGCGCCACGCTTCCCGAAGGGAGA  
AAGGCGGACAGGTATCCGGTAAGCGGCAGGGTCGGAACAGGAGAGCGC  
ACGAGGGAGCTTCCAGGGGGAAACGCCTGGTATCTTTATAGTCCTGTCCG  
GTTTCGCCACCTCTGACTTGAGCGTCGATTTTTGTGATGCTCGTCAGGGG  
GCGGAGCCTATGGAAAAACGCCAGCAACGCGGCCCTTTTTACGGTTCCTGG  
CCTTTTGCTGGCCTTTTGCTCACATGTTCTTTCCTGCGTTATCCCCTGATTC  
TGTGGATAACCGTATTACCGCCTTTGAGTGAGCTGATACCGCTCGCCGCA  
GCCGAACGACCGAGCGCAGCGAGTCAGTGAGCGAGGAAGCGGAAGAGC  
GCCTGATGCGGTATTTTCTCCTTACGCATCTGTGCGGTATTTACACCGCA  
TATATGGTGCACCTCTCAGTACAATCTGCTCTGATGCCGCATAGTTAAGCCA  
GTATACTCCGCTATCGCTACGTGACTGGGTCATGGCTGCGCCCCGACA  
CCCGCCAACACCCGCTGACGCGCCCTGACGGGCTTGTCTGCTCCCGGCA  
TCCGCTTACAGACAAGCTGTGACCGTCTCCGGGAGCTGCATGTGTGAGAG  
GTTTTACCGTCATCACCGAAACGCGCGAGGCAGCTGCGGTAAGCTCAT  
CAGCGTGGTTCGTGAAGCGATTACAGATGTCTGCCTGTTTATCCGCGTCC  
AGCTCGTTGAGTTTCTCCAGAAGCGTTAATGTCTGGCTTCTGATAAAGCGG  
GCCATGTTAAGGGCGGTTTTTCTGTTTGGTCACTGATGCCTCCGTGTAA  
GGGGGATTTCTGTTTATGGGGGTAATGATACCGATGAAACGAGAGAGGAT  
GCTCACGATACGGGTTACTGATGATGAACATGCCCGGTTACTGGAACGTT  
GTGAGGGTAAACAACCTGGCGGTATGGATGCGGCGGGACCAGAGAAAAAT  
CACTCAGGGTCAATGCCAGCGCTTCGTTAATACAGATGTAGGTGTTCCACA  
GGGTAGCCAGCAGCATCCTGCGATGCAGATCCGGAACATAATGGTGCAG  
GGCGCTGACTTCCGCGTTTTCCAGACTTTACGAAACACGGAAACCGAAGAC  
CATTGATGTTGTTGCTCAGGTTCGAGACGTTTTGCAGCAGCAGTCGCTTCA  
CGTTTCGCTCGCGTATCGGTGATTCATTCTGCTAACCAGTAAGGCAACCCC  
GCCAGCCTAGCCGGTCTCAACGACAGGAGCACGATCATGCGCACCCG  
TGGCCAGGACCCAACGCTGCCCGAGATGCGCCGCGTGCAGGCTGCTGGA  
GATGGCGGACGCGATGGATATGTTCTGCCAAGGGTTGGTTTGCGCATTCA  
CAGTTCTCCGCAAGAATTGATTGGCTCCAATTCTTGGAGTGGTGAATCCGT  
TAGCGAGGTGCCGCGGCTTCCATTGAGGTTCGAGGTGGCCCGGCTCCAT  
GCACCGCGACGCAACGCGGGGAGGCAGACAAGGTATAGGGCGGGCGCCT  
ACAATCCATGCCAACCCGTTCCATGTGCTCGCCGAGGCGGCATAAATCGC  
CGTGACGATCAGCGGTCCAGTGATCGAAGTTAGGCTGGTAAGAGCCGCG  
AGCGATCCTTGAAGCTGTCCCTGATGGTTCGTCATCTACCTGCCTGGACAG  
CATGGCCTGCAACGCGGGCATCCCGATGCCGCCGGAAGCGAGAAGAATC  
ATAATGGGGAAGGCCATCCAGCCTCGCGTCGCGAACGCCAGCAAGACGT  
AGCCCAGCGCGTTCGGCCGCCATGCCGGCGATAATGGCCTGCTTCTCGCC  
GAAACGTTTGGTGGCGGGACCAGTGACGAAGGCTTGAAGCGAGGGCGTGC  
AAGATTCCGAATACCGCAAGCGACAGGCCGATCATCGTCGCGCTCCAGC  
GAAAGCGGTCTCGCCGAAAATGACCCAGAGCGCTGCCGGCACCTGTCC  
TACGAGTTGCATGATAAAGAAGACAGTCATAAGTGCGGGCAGCAGATAGTCAT  
GCCCCGCGCCACCGGAAGGAGCTGACTGGGTTGAAGGCTCTCAAGGGC  
ATCGGTGACGCTCTCCCTTATGCGACTCCTGCATTAGGAAGCAGCCAG  
TAGTAGGTTGAGGCCGTTGAGCACCGCCCGCAAGGAATGGTGCATGC  
AAGGAGATGGCGCCCAACAGTCCCCCGCCACGGGGCCTGCCACCATAC  
CCACGCCGAAACAAGCGCTCATGAGCCCGAAGTGGCGAGCCCGATCTTC  
CCCATCGGTGATGTGCGCGATATAGGCGCCAGCAACCGCACCTGTGGCG

CCGGTGATGCCGGCCACGATGCGTCCGGCGTAGAGGATCGAGATCTCGA  
TCCCGCGAAAT

iSpinach DNA template

<https://benchling.com/s/seq-4ZEaWlbn03qfH2lI0Mgk>

T7 promoter, iSpinach coding sequence

tgccacctgacgtctaagaaCCTTAATACGACTCACTATAGGGccataccaacgacgag  
cgtgacGGGAGTACGGTGAGGGTCGGGTCCAGTAGCTTCGGCTACTGTTGA  
GTAGAGTGTGGGCTCCGTACTIONGtcacgctcgtcgtttggtagctcactcaaaggcgg  
aat

crRNA DNA template, specific for Lbu Cas13a and *E. coli* RNA target

<https://benchling.com/s/seq-9tO076KKpnMBWk4Tptcf>

T7 promoter, Lbu scaffold, target complementary sequence

gtgtgagctcctaatacgcactcactatagggaccaccccaaaaatgaaggggactaaaacaACTTTA  
CTCCCTTCCTCCCGCTGAAAGat

Cognate targetRNA DNA template, sub-sequence of *E. coli* 16S rRNA

<https://benchling.com/s/seq-7tal0IXQ3f8a2ircGWWc>

T7 promoter, crRNA complementary sequence

tgccacctgacgtctaagaaagtgtgagctcctaatacgcactcactatagggCAAGCCTGATGCAG  
CCATGCCGCGTGTATGAAGAAGGCCTTCGGGTTGTAAAGTACTTTCAGCG  
GGGAGGAAGGGAGTAAAGTTAATACCTTTGCTCATTGACGTTACCCGCAGA  
AGAAGCACCGGCTAAgctcactcaaaggcggtaat

Non-cognate targetRNA DNA template, sub-sequence of *B. subtilis* 16S rRNA  
<https://benchling.com/s/seq-1qllvBpAFT35ptsmbSm>  
T7 promoter

```
tgccacctgacgtctaagaaagtgagctcctaatacgactcactataggAAGTCTGACGGAG  
CAACGCCGCGTGAGTGATGAAGGTTTTCGGATCGTAAAGCTCTGTTGTTAG  
GGAAGAACAAGTACCGTTCGAATAGGGCGGTACCTTGACGGTACCTAACC  
AAAAAGCCACGGCTAAGctcactcaaaggcgtaat
```
